# Supplementary material
Source: ML conference proceedings conference paper supplement (https://openaccess.thecvf.com/content/CVPR2023/html/Chen_DPF_Learning_Dense_CVPR_2023_paper.html)
Supplement: Supplementary file 1 [file Chen_DPF_Learning_Dense_CVPR_2023_supplemental.pdf]

# DPF: Learning Dense Prediction Fields with Weak Supervision

## Supplementary Material

Xiaoxue Chen<sup>1</sup>, Yuhang Zheng<sup>2</sup>, Yupeng Zheng<sup>3</sup>  
Qiang Zhou<sup>1</sup>, Hao Zhao<sup>1</sup>, Guyue Zhou<sup>1</sup>, Ya-Qin Zhang<sup>1</sup>  
<sup>1</sup>AIR, Tsinghua University <sup>2</sup>BUAA <sup>3</sup>CASIA

{chenxiaoxue, zhaohao}@air.tsinghua.edu.cn, zyh\_021@buaa.edu.cn

In this supplementary material, we provide more experiment results to show the effectiveness of DPFs. In the following sections, we first provide our training details, then we present per-category evaluation results on scene parsing. Afterward, we provide more visualization results for both scene parsing and intrinsic decomposition. Finally, we give more analysis experiments to investigate DPFs.

### 1. Training Details

We use the “poly” learning rate policy in which the current learning rate equals the base one multiplying  $(1 - \frac{epoch_{current}}{epoch_{max}})^{0.9}$ . On PascalContext, we set the base learning rate to 0.028, while on ADE20k, we set the base learning rate to 0.035. For the IIW dataset, the base learning rate is set to 0.007. We set power to 0.9 on all datasets. Momentum and weight decay are set to 0.9 and 0.0001 respectively. The number of training epochs is set to 70 for PascalContext, 60 for ADE20k, and 30 for IIW dataset. For data augmentation, we exploit random rotation between -10 and 10 degrees and a random scale between 0.5 and 2 for all datasets. In addition, we add a random crop with the size of  $512 \times 512$  and a random horizontal flip. The comprehensive data augmentation scheme makes the network resist overfitting. Last, we normalize the RGB channels of images from a 0~255 range to a -1~1 range which can speed up the convergence of the model and improve the performance.

For PascalContext and ADE20k, we use *DistributedDataParallel* and train DPFs with four GPUs with batch size 2 per GPU. For IIW, we train the model on a single GPU while setting the batch size to 2.

### 2. Per-Category Evaluation

Fig. 1, 2 show per-category semantic IoU comparison between DPF and baseline on PASCALContext [3] and ADE20k respectively [4]. Tab. 5, 4 provide specific IoU. It is manifested that our DPFs achieve better performance in most categories. Notably, the baseline results are 0 in some categories, (e.g., mouse, truck, and bus on PascalContext)

| Weight   | PASCAL      | ADE20k      | IIW         |
|----------|-------------|-------------|-------------|
| Distance | 44.2        | 32.1        | 12.9        |
| Learned  | <b>45.3</b> | <b>33.8</b> | <b>11.9</b> |

Table 1. Quantitative results on the options of weights.

while DPFs achieve significant growth of IoU in these categories. We believe this is credited to the guidance feature, which provides detailed semantic information and benefits the fine-grained segmentation.

### 3. More Qualitative Results

**Scene parsing.** Fig. 3, 4 shows some qualitative results for scene parsing on PascalContext and ADE20k datasets respectively. Compared with the baseline prediction, DPF produces more precise results. Specifically, the predictions of DPF have fewer noise patches, and the segmented shapes of objects are also more reasonable and clearer, which is credited to the smoothness of DPFs.

**Intrinsic decomposition.** Fig. 5 presents some representative qualitative results on IIW. As shown in the area marked by the red box in the figure, DPF can distinguish the shadows of objects and successfully decompose the wall or ground into consistent reflectance. Also, it is manifested from the yellow box that our model can also predict the clothes with wrinkles as the same reflectance. These results illustrate the capability of DPF on intrinsic decomposition.

### 4. More Ablation Study

**Interpolation weights.** We conduct an experiment to investigate the importance of using an MLP to predict the interpolation weights. We use bilinear interpolation with relative distances as weights, and the results are provided in Tab. 1. Obviously, the results of using the predicted weights are better, because the predicted weights not only leverage the spatial affinity between the query point and its neighbor

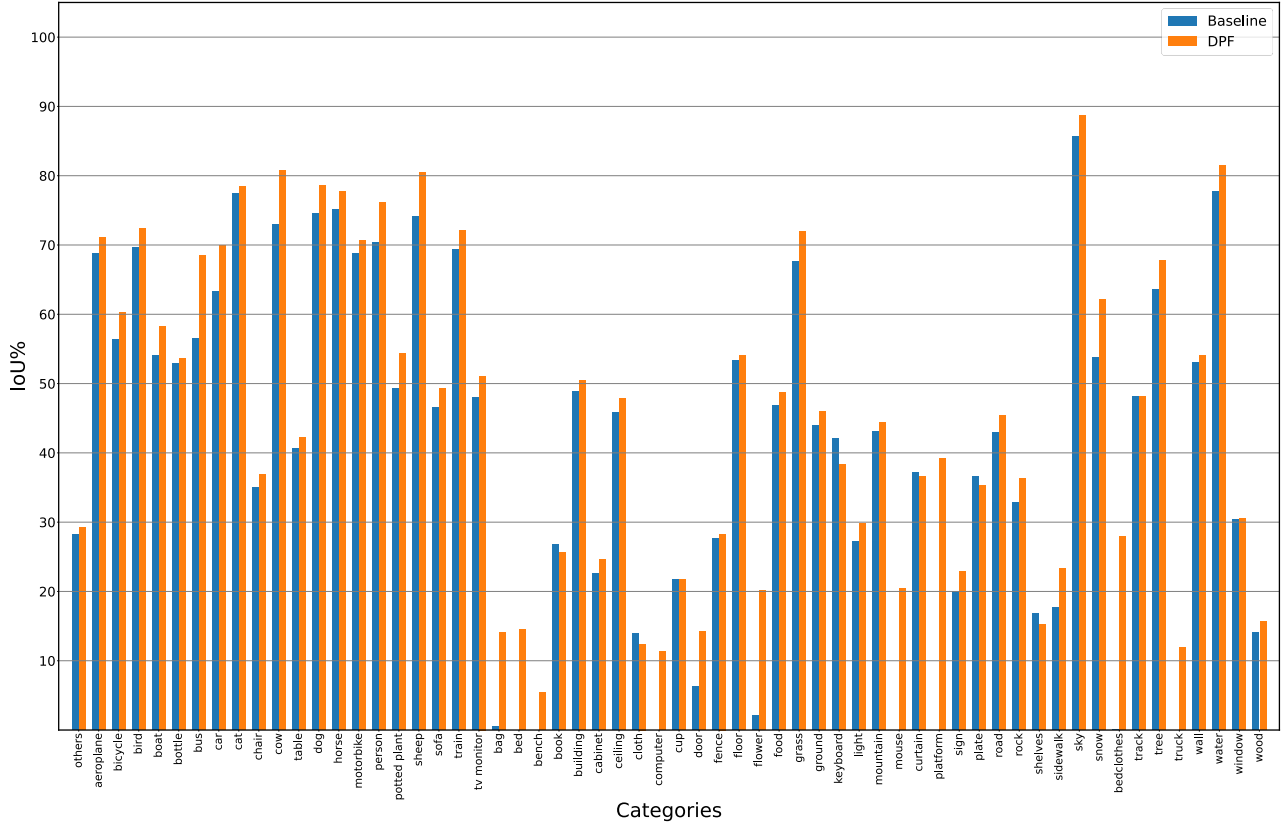

Figure 1. Per-category evaluation on PASCALContext dataset.

| Method       | PASCAL      | ADE20k      |
|--------------|-------------|-------------|
| DPT          | 40.4        | 30.4        |
| DPT+denseCRF | 41.3        | 31.1        |
| DPT+DPF      | <b>45.3</b> | <b>33.8</b> |

Table 2. Quantitative results on the effects of DPF.

pixels but also consider the semantic correlation provided by the latent code.

**Comparisons with CRF method.** CRFs are conventional techniques that smooth the dense prediction results on top of dense prediction baselines using low-level features, which work in a similar spirit to DPF. To compare with CRF, we additionally post-process the outputs of DPT baselines using denseCRF [2], and the results are shown in Tab. 2. Since the prediction of intrinsic decomposition is a continuous value between 0-1, and the denseCRF method requires a discrete label set, we only provide the results on ADE20k and PASCAL. As shown in the table, DPF outperforms the denseCRF method with clear margins, demonstrating its superiority with CRF.

## 5. Analysis Experiment

**DPF is effective in the intrinsic decomposition of different materials.** Tab. 6 presents the reflectance precision on different materials. We use a pre-trained model of [1] to pre-process the IIW dataset and get attribute maps for each test image. For a pair of comparison points, we can easily get their attribute from the coordinates on the attribute maps. If the predicted relative reflectance of the comparison pair is correct, we consider the reflectance predictions of the two points to be correct. With the above preliminaries, we calculate the per-attribute precision of both baseline and DPF. The results show that DPF has superior performance in different attributes compared with baseline. Moreover, DPF gets higher precision on attributes such as wall and painted, while glass and metal have lower precision, which demonstrates that the model works better on diffuse materials, while intrinsic decomposition with specular reflection is relatively difficult.

## 6. Transductive Learning

**DPF achieves superior performance on both inductive learning and transductive learning.** Inductive learn-

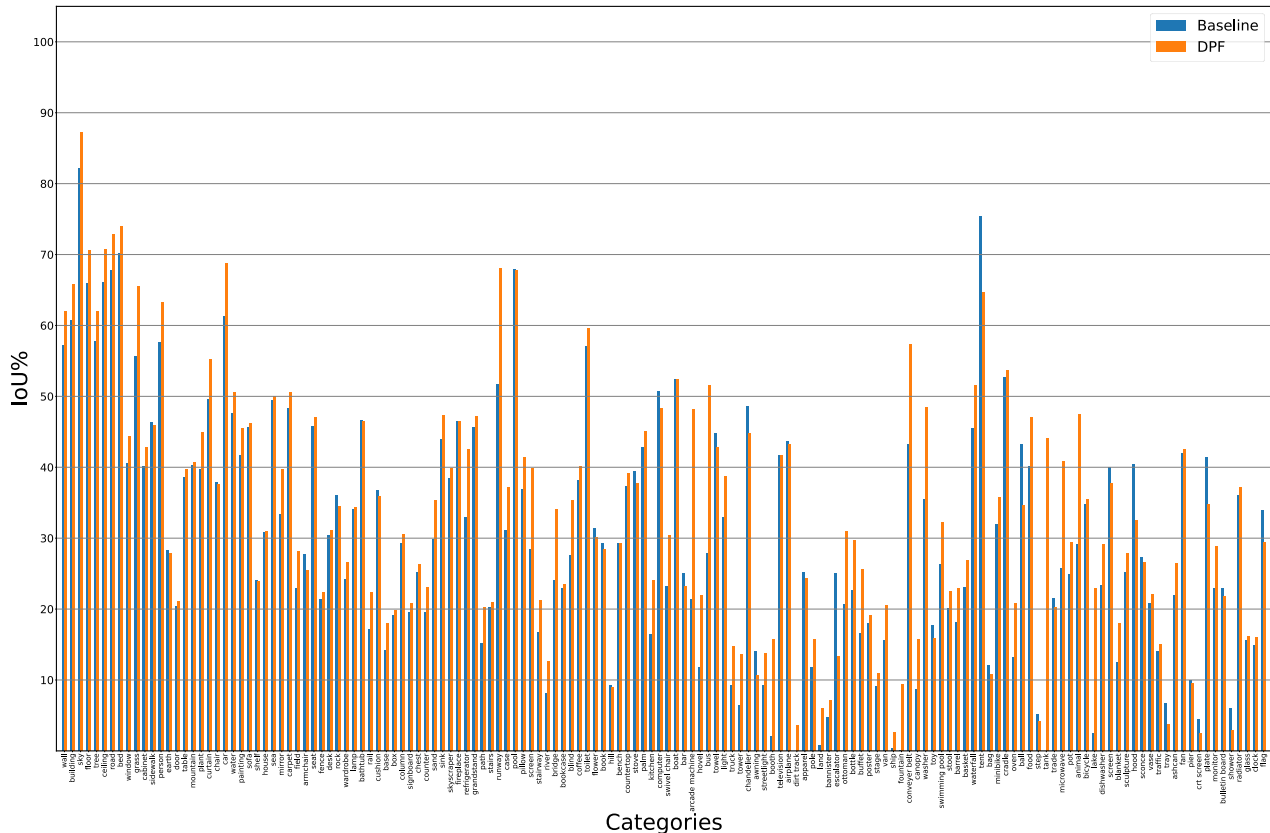

Figure 2. Per-category evaluation on ADE20k dataset.

ing, which represents the generalization of models, means learning from one sample and testing on another unseen sample. While transductive learning refers to testing on the unlabeled sample where we have obtained features during training. Commonly, weakly supervised learning may refer to both inductive learning and transductive learning because of the number of unlabeled pixels in the image. In Table. 3, it is obvious that our DPF is also effective in transductive learning on both datasets. Especially on PascalContext, DPF has a strong lead of 14.7%. This demonstrates that our proposed DPF is a general framework that is not specific to the inductive or transductive solution.

| Dataset | Method      | mIoU                |
|---------|-------------|---------------------|
| PASCAL  | Baseline(%) | 46.5                |
|         | w/DPF (%)   | <b>61.2 (+14.7)</b> |
| ADE20k  | Baseline(%) | 38.0                |
|         | w/DPF (%)   | <b>42.4 (+4.4)</b>  |

Table 3. Transductive learning on PASCALContext and ADE20k unlabeled training sets, compared with DPT(baseline).

## References

- [1] Xiaoxue Chen, Tianyu Liu, Hao Zhao, Guyue Zhou, and Yaqin Zhang. Cerberus transformer: Joint semantic, affordance and attribute parsing. In *Proceedings of the IEEE/CVF Conference on Computer Vision and Pattern Recognition*, pages 19649–19658, 2022. 2
- [2] Philipp Krähenbühl and Vladlen Koltun. Efficient inference in fully connected crfs with gaussian edge potentials. *Advances in neural information processing systems*, 24, 2011. 2
- [3] Roozbeh Mottaghi, Xianjie Chen, Xiaobai Liu, Nam-Gyu Cho, Seong-Whan Lee, Sanja Fidler, Raquel Urtasun, and Alan Yuille. The role of context for object detection and semantic segmentation in the wild. In *IEEE Conference on Computer Vision and Pattern Recognition (CVPR)*, 2014. 1
- [4] Bolei Zhou, Hang Zhao, Xavier Puig, Sanja Fidler, Adela Barriuso, and Antonio Torralba. Scene parsing through ade20k dataset. In *Proceedings of the IEEE conference on computer vision and pattern recognition*, pages 633–641, 2017. 1

|               |              |             |             |             |                |               |             |             |                |               |
|---------------|--------------|-------------|-------------|-------------|----------------|---------------|-------------|-------------|----------------|---------------|
| <b>Method</b> | wall         | building    | sky         | floor       | tree           | ceiling       | road        | bed         | window         | grass         |
| Baseline(%)   | 57.2         | 60.8        | 82.1        | 66.0        | 57.8           | 66.0          | 67.8        | 70.2        | 40.5           | 55.6          |
| DPF(%)        | <b>62.0</b>  | <b>65.8</b> | <b>87.2</b> | <b>70.5</b> | <b>62.0</b>    | <b>70.7</b>   | <b>72.9</b> | <b>74.0</b> | <b>44.4</b>    | <b>65.5</b>   |
| <b>Method</b> | cabinet      | sidewalk    | person      | earth       | door           | table         | mountain    | plant       | curtain        | chair         |
| Baseline(%)   | 40.2         | <b>46.4</b> | 57.6        | <b>28.3</b> | 20.3           | 38.6          | 40.2        | 39.7        | 49.6           | <b>37.8</b>   |
| DPF(%)        | <b>42.9</b>  | 45.9        | <b>63.3</b> | 27.8        | <b>21.1</b>    | <b>39.7</b>   | <b>40.7</b> | <b>44.9</b> | <b>55.2</b>    | 37.5          |
| <b>Method</b> | car          | water       | painting    | sofa        | shelf          | house         | sea         | mirror      | carpet         | field         |
| Baseline(%)   | 61.3         | 47.6        | 41.7        | 45.6        | <b>24.1</b>    | 30.8          | 49.4        | 33.3        | 48.2           | 23.0          |
| DPF(%)        | <b>68.8</b>  | <b>50.6</b> | <b>45.4</b> | <b>46.2</b> | 23.9           | <b>30.9</b>   | <b>50.0</b> | <b>39.8</b> | <b>50.5</b>    | <b>28.1</b>   |
| <b>Method</b> | armchair     | seat        | fence       | desk        | rock           | wardrobe      | lamp        | bathtub     | rail           | cushion       |
| Baseline(%)   | <b>27.7</b>  | 45.8        | 21.4        | 30.4        | <b>36.0</b>    | 24.2          | 34.1        | <b>45.6</b> | 17.2           | <b>36.7</b>   |
| DPF(%)        | 25.4         | <b>47.1</b> | <b>22.3</b> | <b>31.2</b> | 34.5           | <b>26.6</b>   | <b>34.4</b> | 46.5        | <b>22.3</b>    | 35.9          |
| <b>Method</b> | base         | box         | column      | signboard   | chest          | counter       | sand        | sink        | skyscraper     | fireplace     |
| Baseline(%)   | 14.1         | 19.1        | 29.3        | 19.6        | 25.2           | 19.5          | 29.9        | 43.9        | 38.4           | <b>46.5</b>   |
| DPF(%)        | <b>17.9</b>  | <b>19.8</b> | <b>30.5</b> | <b>20.8</b> | <b>26.3</b>    | <b>23.1</b>   | <b>35.4</b> | <b>47.3</b> | <b>39.8</b>    | 46.4          |
| <b>Method</b> | refrigerator | grandstand  | path        | stairs      | runway         | case          | pool        | pillow      | screen         | stairway      |
| Baseline(%)   | 32.9         | 45.7        | 15.2        | 20.2        | 51.7           | 31.0          | <b>68.0</b> | 36.9        | 28.4           | 16.7          |
| DPF(%)        | <b>42.6</b>  | <b>47.2</b> | <b>20.2</b> | <b>20.9</b> | <b>68.1</b>    | <b>37.1</b>   | 67.7        | <b>41.4</b> | <b>39.8</b>    | <b>21.2</b>   |
| <b>Method</b> | river        | bridge      | bookcase    | blind       | coffee         | toilet        | flower      | book        | hill           | bench         |
| Baseline(%)   | 8.2          | 24.0        | 22.9        | 27.6        | 38.1           | 57.0          | <b>31.3</b> | <b>29.2</b> | <b>9.2</b>     | 29.3          |
| DPF(%)        | <b>12.6</b>  | <b>34.0</b> | <b>23.4</b> | <b>35.3</b> | <b>40.1</b>    | <b>59.6</b>   | 30.1        | 28.4        | 8.9            | <b>29.3</b>   |
| <b>Method</b> | countertop   | stove       | palm        | kitchen     | computer       | swivel chair  | boat        | bar         | arcade machine | hovel         |
| Baseline(%)   | 37.3         | <b>39.4</b> | 42.8        | 16.5        | <b>50.6</b>    | 23.2          | <b>52.5</b> | <b>25.0</b> | 21.3           | 11.8          |
| DPF(%)        | <b>39.1</b>  | 37.7        | <b>45.0</b> | <b>24.1</b> | 48.2           | <b>30.4</b>   | 52.4        | 23.2        | <b>48.2</b>    | <b>21.9</b>   |
| <b>Method</b> | bus          | towel       | light       | truck       | tower          | chandelier    | awning      | streetlight | booth          | television    |
| Baseline(%)   | 27.9         | <b>44.8</b> | 32.9        | 9.3         | 6.4            | <b>48.5</b>   | <b>14.1</b> | 9.3         | 2.0            | 41.6          |
| DPF(%)        | <b>51.6</b>  | 42.7        | <b>38.7</b> | <b>14.7</b> | <b>13.6</b>    | 44.7          | 10.6        | <b>13.8</b> | <b>15.7</b>    | <b>41.6</b>   |
| <b>Method</b> | airplane     | dirt track  | apparel     | pole        | land           | bannister     | escalator   | ottoman     | bottle         | buffet        |
| Baseline(%)   | <b>43.7</b>  | 0.0         | <b>25.2</b> | 11.8        | 0.7            | 4.7           | <b>25.0</b> | 20.6        | 22.6           | 16.5          |
| DPF(%)        | 43.3         | <b>3.7</b>  | 24.3        | <b>15.7</b> | <b>6.0</b>     | <b>7.1</b>    | 13.3        | <b>31.0</b> | <b>29.6</b>    | <b>25.6</b>   |
| <b>Method</b> | poster       | stage       | van         | ship        | fountain       | conveyer belt | canopy      | washer      | toy            | swimming pool |
| Baseline(%)   | 17.9         | 9.1         | 15.6        | 0.3         | 0.0            | 43.2          | 8.7         | 35.5        | <b>17.7</b>    | 26.3          |
| DPF(%)        | <b>19.1</b>  | <b>10.9</b> | <b>20.6</b> | <b>2.5</b>  | <b>9.3</b>     | <b>57.4</b>   | <b>15.8</b> | <b>48.4</b> | 15.8           | <b>32.3</b>   |
| <b>Method</b> | stool        | barrel      | basket      | waterfall   | tent           | bag           | minibike    | cradle      | oven           | ball          |
| Baseline(%)   | 20.1         | 18.1        | 23.1        | 45.4        | <b>75.4</b>    | <b>12.0</b>   | 31.9        | 52.7        | 13.2           | <b>43.2</b>   |
| DPF(%)        | <b>22.5</b>  | <b>23.0</b> | <b>26.9</b> | <b>51.5</b> | 64.7           | 10.8          | <b>35.7</b> | <b>53.6</b> | <b>20.8</b>    | 34.6          |
| <b>Method</b> | food         | step        | tank        | trade       | microwave      | pot           | animal      | bicycle     | lake           | dishwasher    |
| Baseline(%)   | 40.1         | <b>5.1</b>  | 0.0         | <b>21.5</b> | 25.7           | 24.9          | 29.2        | 34.8        | 2.5            | 23.3          |
| DPF(%)        | <b>47.1</b>  | 4.2         | <b>44.1</b> | 20.2        | <b>40.8</b>    | <b>29.4</b>   | <b>47.5</b> | <b>35.4</b> | <b>22.9</b>    | <b>29.1</b>   |
| <b>Method</b> | screen       | blanket     | sculpture   | hood        | sconce         | vase          | traffic     | tray        | ashcan         | fan           |
| Baseline(%)   | <b>40.1</b>  | 12.5        | 25.2        | <b>40.5</b> | <b>27.3</b>    | 20.8          | 14.1        | <b>6.7</b>  | 21.9           | 42.0          |
| DPF(%)        | 37.7         | <b>17.9</b> | <b>27.9</b> | 32.6        | 26.6           | <b>22.1</b>   | <b>15.0</b> | 3.8         | <b>26.5</b>    | <b>42.5</b>   |
| <b>Method</b> | pier         | crt screen  | plate       | monitor     | bulletin board | shower        | radiator    | glass       | clock          | flag          |
| Baseline(%)   | <b>9.9</b>   | <b>4.5</b>  | <b>41.4</b> | 22.9        | <b>23.0</b>    | <b>6.0</b>    | 36.1        | 15.5        | 14.9           | <b>33.9</b>   |
| DPF(%)        | 9.5          | 2.4         | 34.7        | <b>28.8</b> | 21.8           | 2.9           | <b>37.2</b> | <b>16.2</b> | <b>16.0</b>    | 29.4          |

Table 4. Per-category semantic parsing results on ADE20k.

| Method      | others      | aeroplane   | bicycle     | bird        | boat        | bottle      | bus          | car         | cut         | chair       |
|-------------|-------------|-------------|-------------|-------------|-------------|-------------|--------------|-------------|-------------|-------------|
| Baseline(%) | 28.3        | 68.8        | 56.4        | 69.6        | 54.0        | 52.9        | 56.5         | 63.3        | 77.4        | 35.1        |
| DPF(%)      | <b>29.3</b> | <b>71.1</b> | <b>60.3</b> | <b>72.4</b> | <b>58.2</b> | <b>53.7</b> | <b>68.5</b>  | <b>69.9</b> | <b>78.4</b> | <b>36.8</b> |
| Method      | cow         | table       | dog         | horse       | motorbike   | person      | potted plant | sheep       | sofa        | train       |
| Baseline(%) | 72.9        | 40.6        | 74.6        | 75.2        | 68.7        | 70.3        | 49.3         | 74.1        | 46.5        | 69.3        |
| DPF(%)      | <b>80.8</b> | <b>42.2</b> | <b>78.5</b> | <b>77.8</b> | <b>70.7</b> | <b>76.1</b> | <b>54.4</b>  | <b>80.5</b> | <b>49.2</b> | <b>72.1</b> |
| Method      | TV monitor  | bag         | bed         | bench       | book        | building    | cabinet      | ceiling     | cloth       | computer    |
| Baseline(%) | 48.1        | 0.4         | 0.0         | 0.0         | <b>26.7</b> | 48.9        | 22.6         | 45.8        | <b>13.9</b> | 0.0         |
| DPF(%)      | <b>51.1</b> | <b>14.1</b> | <b>14.5</b> | <b>5.4</b>  | 25.7        | <b>50.4</b> | <b>24.6</b>  | <b>47.8</b> | 12.4        | <b>11.3</b> |
| Method      | cup         | door        | fence       | floor       | flower      | food        | grass        | ground      | keyboard    | light       |
| Baseline(%) | <b>21.8</b> | 6.2         | 27.7        | 53.3        | 2.1         | 46.9        | 67.6         | 43.9        | <b>42.0</b> | 27.3        |
| DPF(%)      | 21.7        | <b>14.3</b> | <b>28.3</b> | <b>54.1</b> | <b>20.1</b> | <b>48.7</b> | <b>72.0</b>  | <b>45.9</b> | 38.3        | <b>29.8</b> |
| Method      | mountain    | mouse       | curtain     | platform    | sign        | plate       | road         | rock        | shelves     | sidewalk    |
| Baseline(%) | 43.1        | 0.0         | <b>37.1</b> | 0.0         | 20.0        | <b>36.6</b> | 43.0         | 32.8        | <b>16.8</b> | 17.7        |
| DPF(%)      | <b>44.4</b> | <b>20.4</b> | 36.6        | <b>39.2</b> | <b>22.8</b> | 35.3        | <b>45.4</b>  | <b>36.3</b> | 15.3        | <b>23.3</b> |
| Method      | sky         | snow        | bedclothes  | track       | tree        | truck       | wall         | water       | window      | wood        |
| Baseline(%) | 85.7        | 53.7        | 0.1         | 48.1        | 63.6        | 0.0         | 53.0         | 77.7        | 30.4        | 14.1        |
| DPF(%)      | <b>88.7</b> | <b>62.1</b> | <b>27.9</b> | <b>48.2</b> | <b>67.7</b> | <b>11.9</b> | <b>54.1</b>  | <b>81.4</b> | <b>30.5</b> | <b>15.7</b> |

Table 5. Per-category semantic parsing results on PascalContext.

| Method      | Wood       | Painted    | Paper      | Glass      | Brick      | Metal     | Flat    | Plastic    | Textured   | Glossy     | Shiny      |
|-------------|------------|------------|------------|------------|------------|-----------|---------|------------|------------|------------|------------|
| Baseline(%) | 71.0       | 82.3       | 30.6       | 29.5       | 79.7       | 7.4       | 3.1     | 18.5       | 57.6       | 21.8       | 55.1       |
| w/DPF(%)    | 72.5(+1.5) | 84.0(+1.7) | 31.4(+0.8) | 30.5(+1.0) | 81.3(+0.6) | 7.9(+0.5) | 3.1(+0) | 18.9(+0.4) | 58.4(+0.8) | 22.2(+0.4) | 56.3(+1.2) |

Table 6. Precision of reflectance prediction on different attributes.

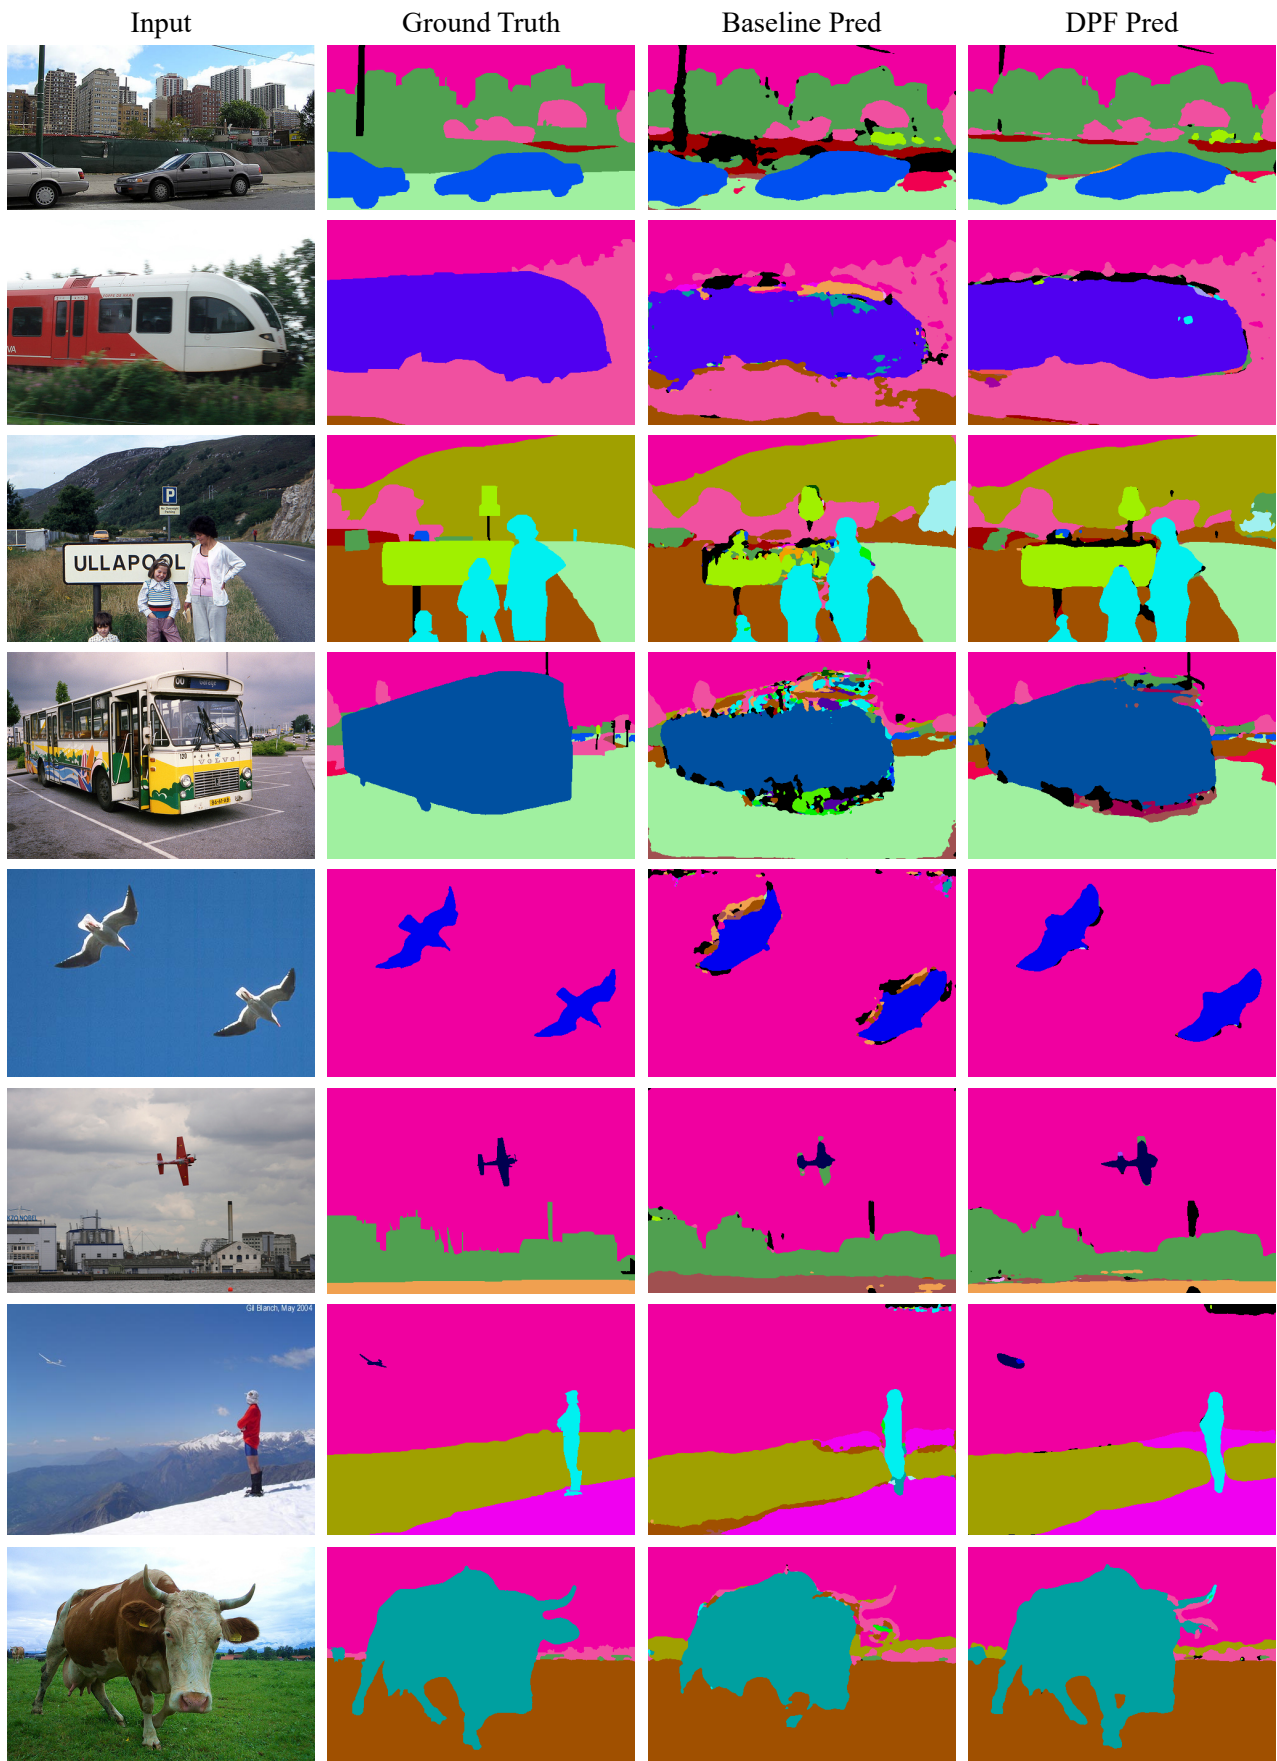

Figure 3. More qualitative results on PascalContext.

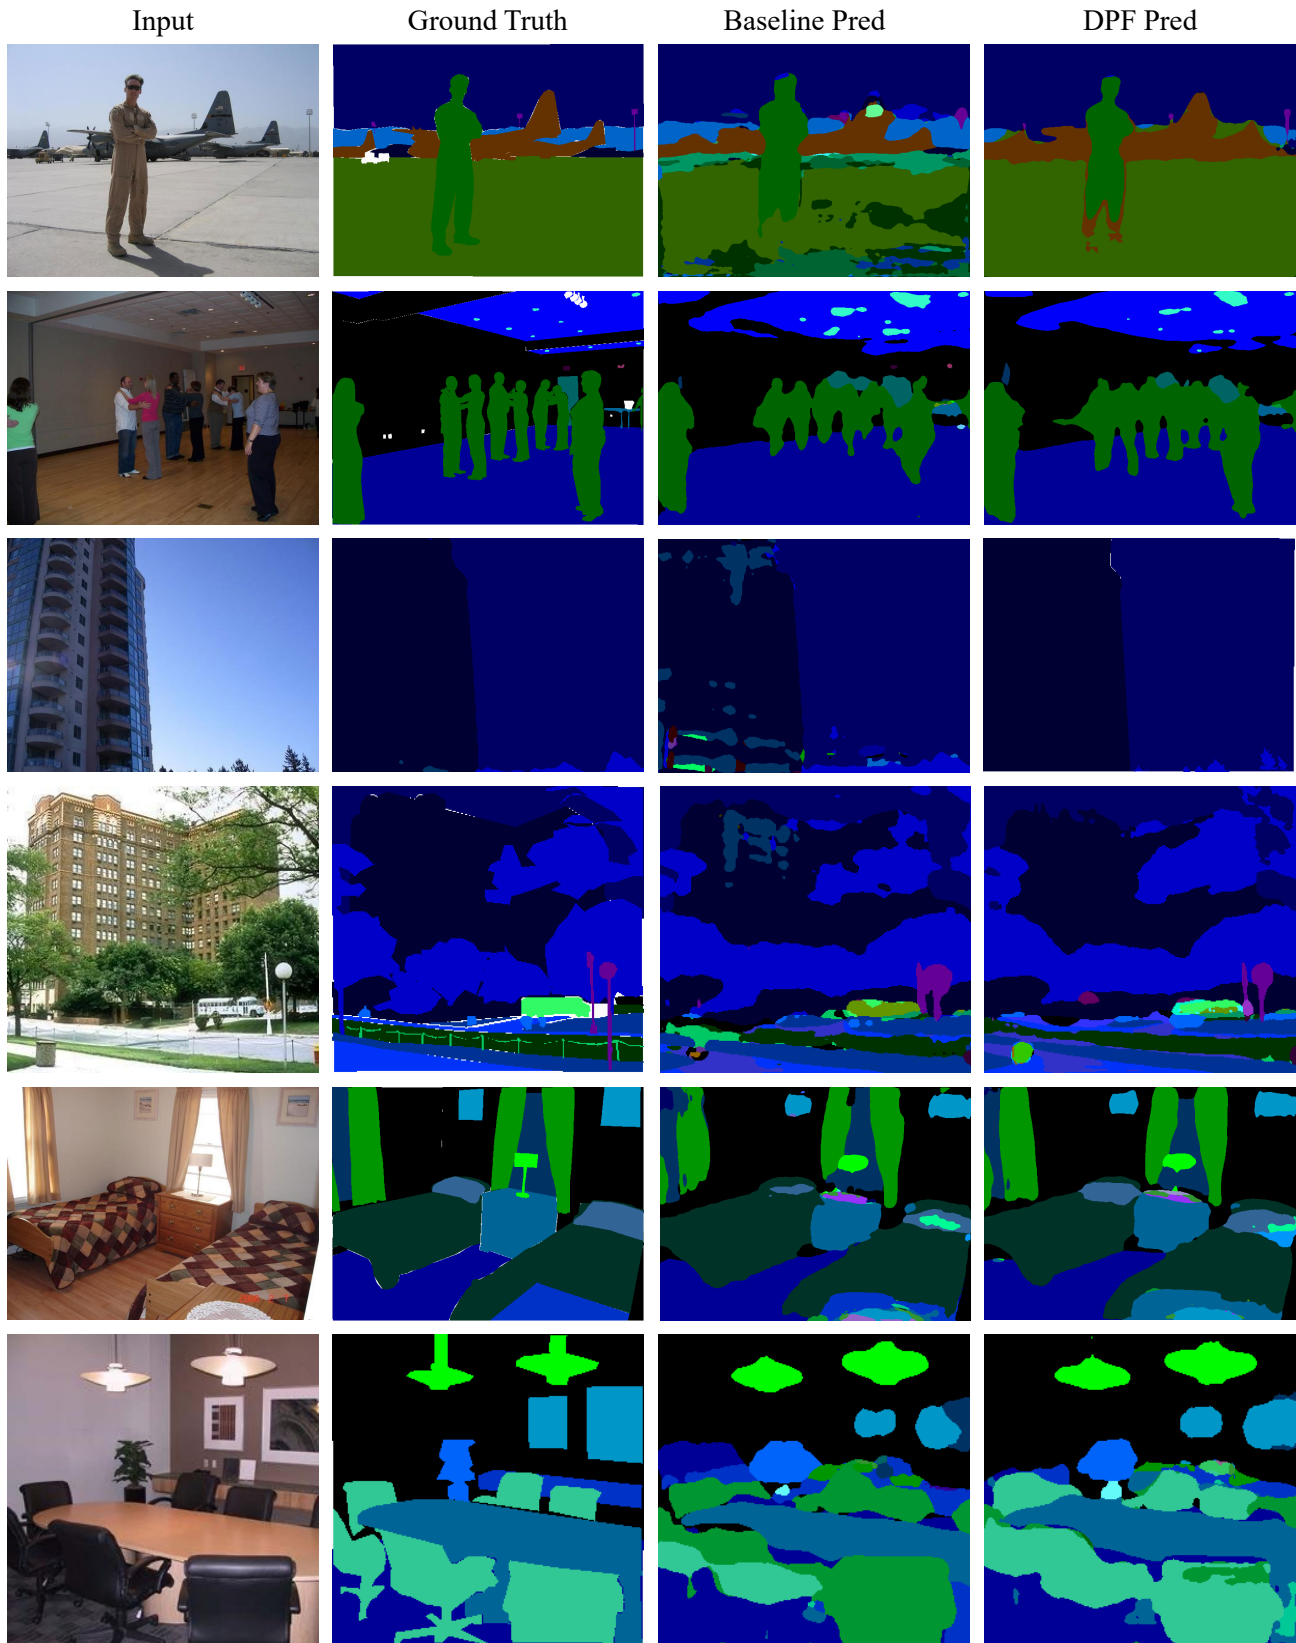

Figure 4. More qualitative results on ADE20k. White stands for mask.

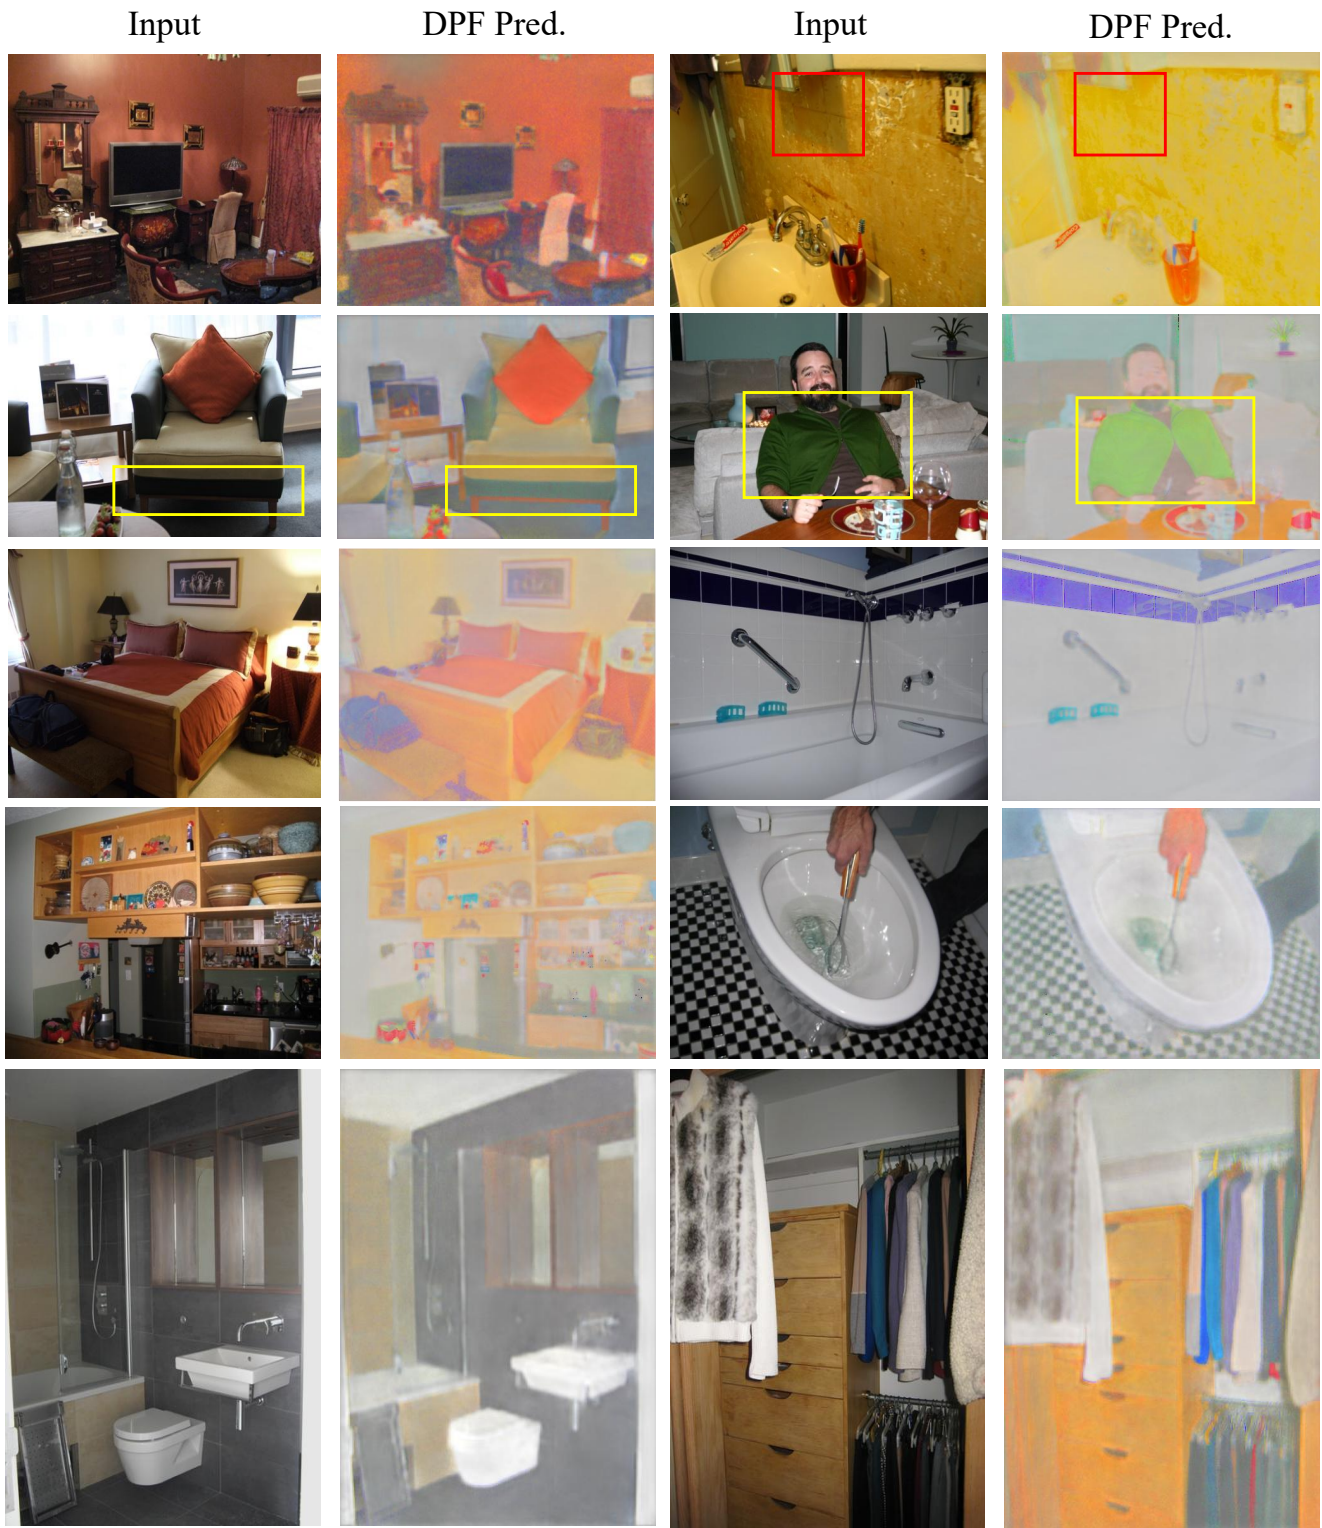

Figure 5. More qualitative results on IIW.
